# Supplementary material
Source: Springer Nature journal article supplement (https://www.springermedizin.de/resource/supplementary/12935_2011_313_MOESM6_ESM.pdf/9540294)

Activity of caspase 3 ( $\mu\text{mol pNA}/\text{min}/\text{ml}$ )

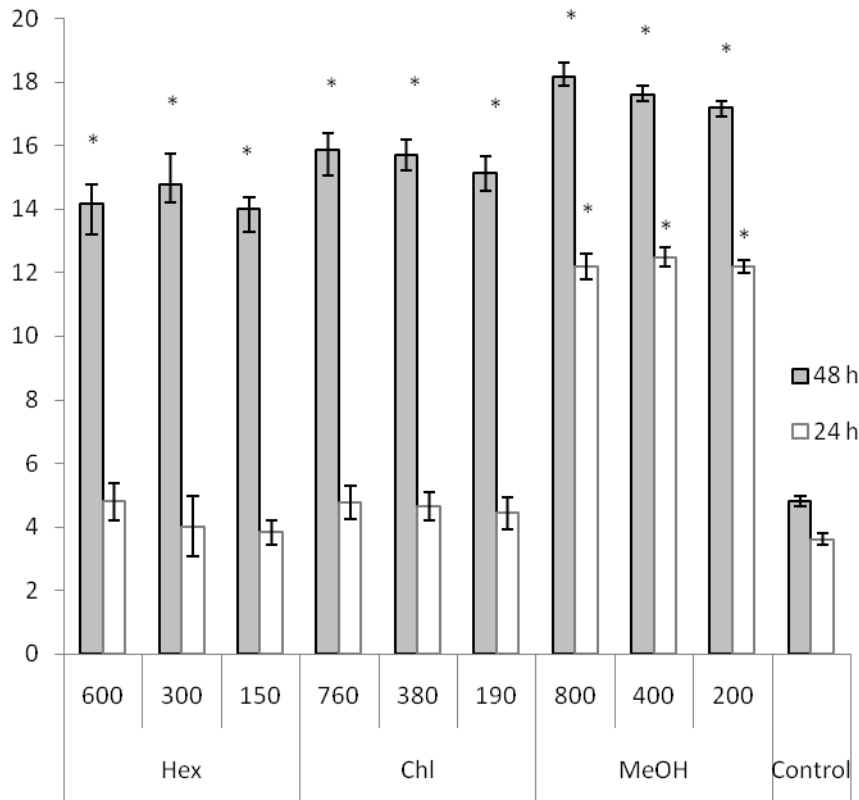

Supplement: MOESM6 [file 9540294]
